# Supplementary material for: In situ growth of Prussian blue analogue-derived Fe-doped NiS on Ni(OH)2 for efficient hydrogen evolution reaction
Source: Royal Society of Chemistry journal article supplement (doi:10.1039/d2dt03332a), 2022-12-26
Supplement: d2dt03332a1.pdf [file d2dt03332a1.pdf]

***In-situ* growth of Prussian blue analogues derived Fe-doped NiS  
on Ni(OH)<sub>2</sub> for efficient hydrogen evolution reaction**

Xinyao Ding<sup>a</sup>, Mingyi Zhang<sup>a,\*</sup>, Xin Chang<sup>a</sup>, and Xuejiao Zhou<sup>a,\*</sup>

*Key Laboratory for Photonic and Electronic Bandgap Materials, Ministry of Education, School of Physics and Electronic Engineering, Harbin Normal University, Harbin 150025, People's Republic of China.*

\*Corresponding author:

E-mail: [zhouxj@hrbnu.edu.cn](mailto:zhouxj@hrbnu.edu.cn) (X.J. Zhou)

E-mail: [zhangmingyi@hrbnu.edu.cn](mailto:zhangmingyi@hrbnu.edu.cn) (M.Y. Zhang)

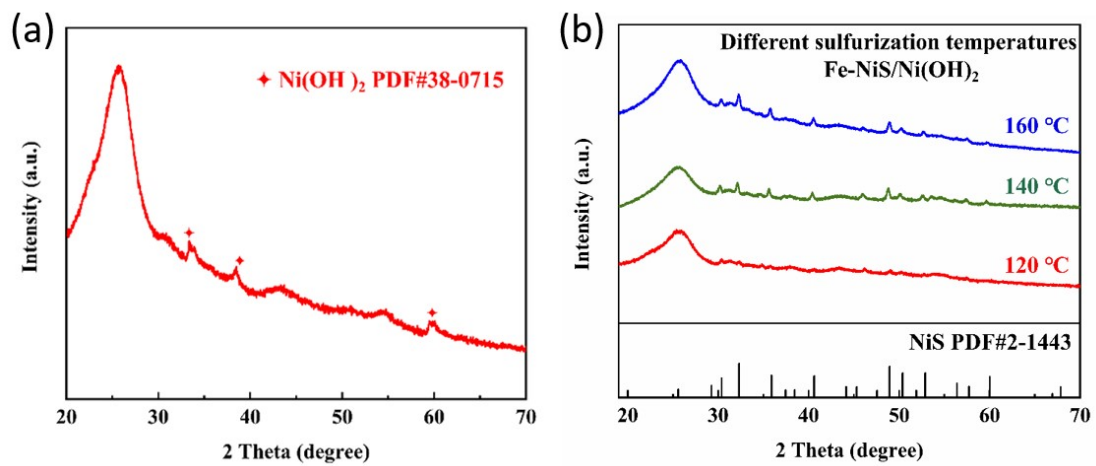

Fig. S1. (a) XRD patterns of NiS/Ni(OH)<sub>2</sub>/CC. (b) XRD patterns of Fe-NiS/Ni(OH)<sub>2</sub>/CC with different sulfurization temperatures.

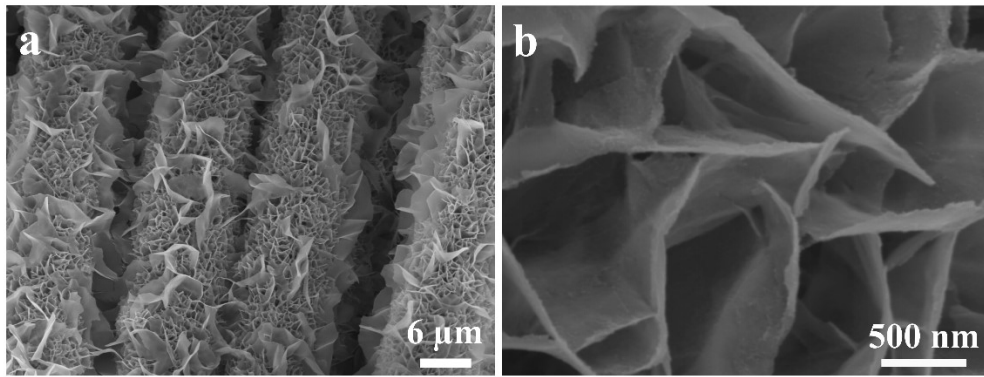

Fig. S2. SEM image of (a, b) NiS/Ni(OH)<sub>2</sub>/CC.

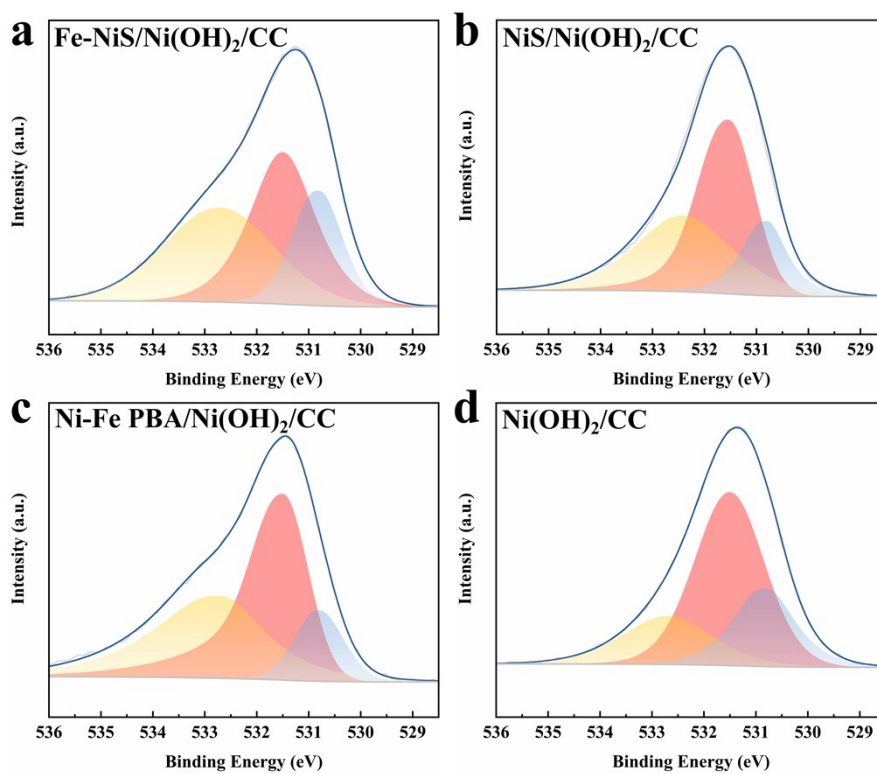

Fig. S3. High-resolution XPS spectra of O 1s (a) Fe-NiS/Ni(OH)<sub>2</sub>/CC; (b) NiS/Ni(OH)<sub>2</sub>/CC; (c) Ni-Fe PBA/Ni(OH)<sub>2</sub>/CC; (d) Ni(OH)<sub>2</sub>/CC.

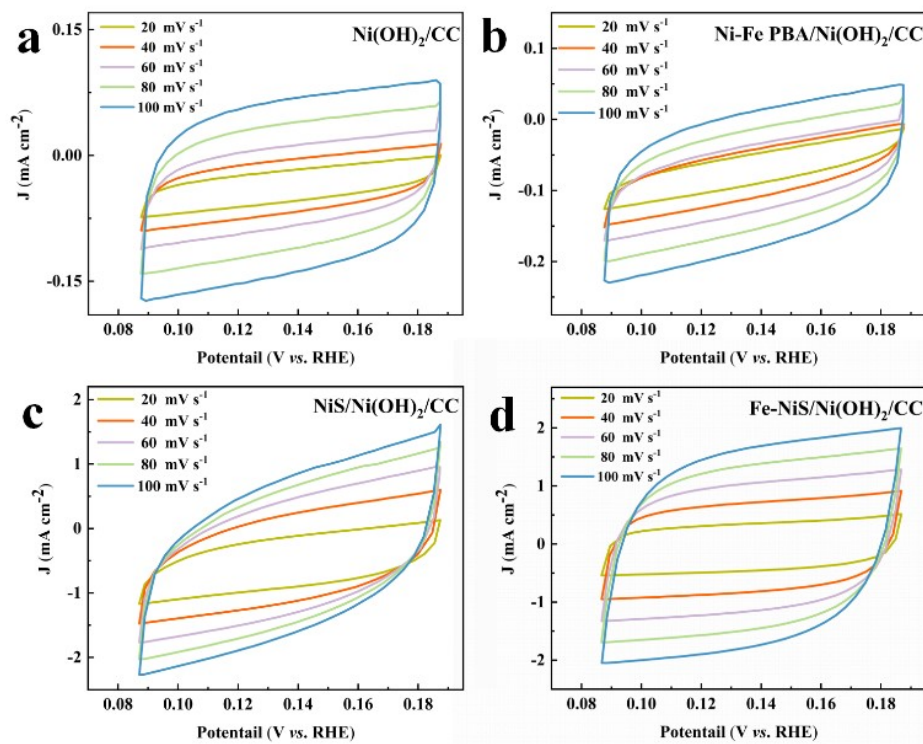

Fig. S4. CVs curves of (a)  $\text{Ni(OH)}_2/\text{CC}$  ; (b) Ni-Fe PBA/ $\text{Ni(OH)}_2/\text{CC}$ ; (c) NiS/ $\text{Ni(OH)}_2/\text{CC}$ ; (d) Fe-NiS/ $\text{Ni(OH)}_2/\text{CC}$  in 1.0 M KOH solution at different scan rates.

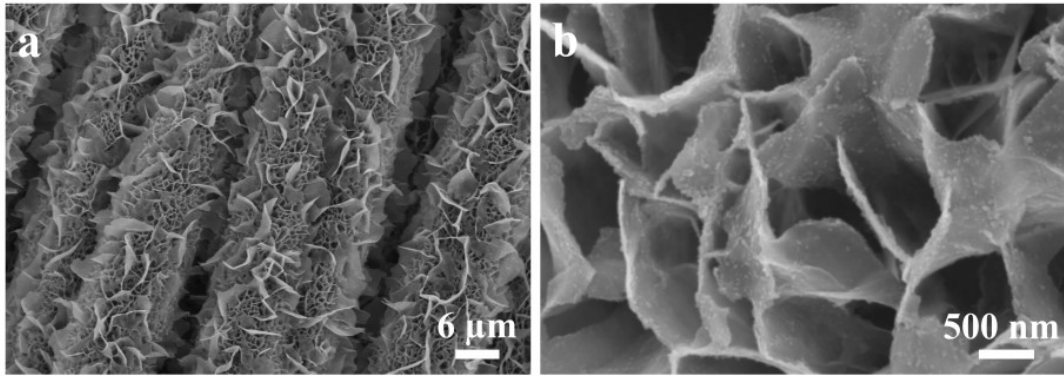

Fig. S5. SEM image of (a, b) Fe-NiS/Ni(OH)<sub>2</sub>/CC after long-term stability test.

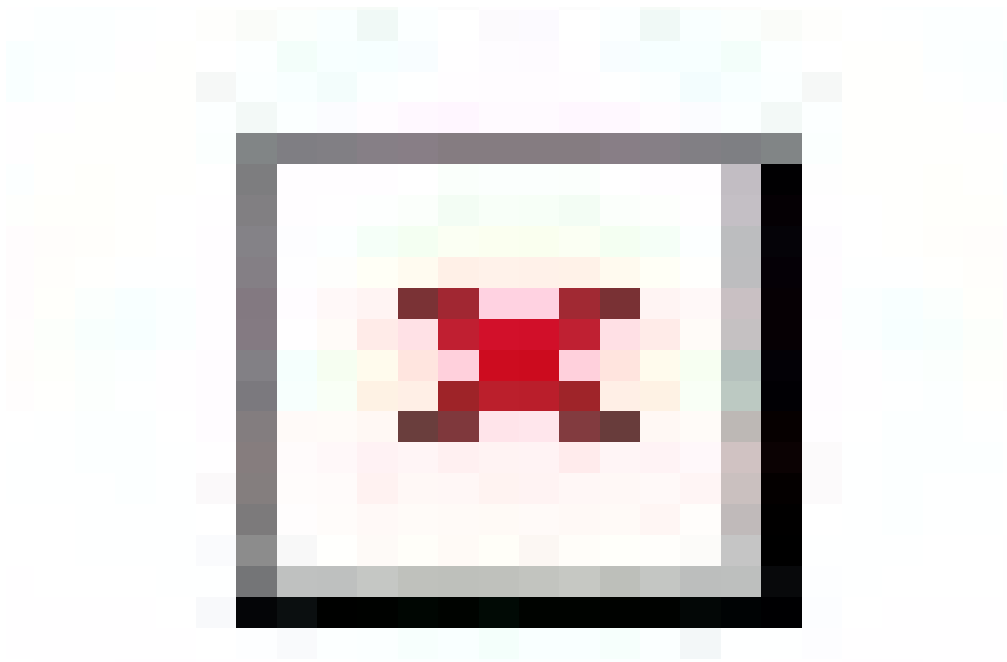

Fig. S6. XRD image of Fe-NiS/Ni(OH)<sub>2</sub>/CC after long-term stability test.
